# Supplementary material for: Reversible fluorescence modulation of BSA stabilised copper nanoclusters for the selective detection of protamine and heparin
Source: Royal Society of Chemistry journal article supplement (doi:10.1039/c8an01703d), 2018-12-21
Supplement: c8an01703d1.pdf [file c8an01703d1.pdf]

## **Reversible Fluorescence Modulation of BSA Stabilised Copper Nanoclusters for the Selective Detection of Protamine and Heparin**

R.S. Aparna<sup>1</sup>, J.S. Anjali Devi<sup>1</sup>, R.R Anjana<sup>1</sup>, John Nebu<sup>1</sup>, Sony George\*<sup>1</sup>

<sup>1</sup>Department of Chemistry, School of Physical and Mathematical Sciences,  
University of Kerala, Kariavattom Campus, Thiruvananthapuram-695581, Kerala, India

\*Corresponding Author

\* Phone:+919446462933, Email: emailtosony@gmail.com

## Supporting Information

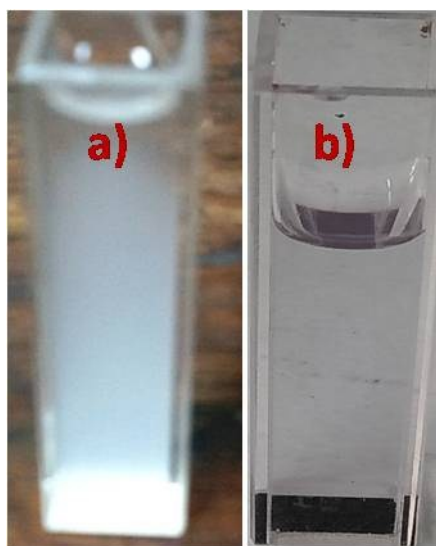

**Fig.S.1** Photographs showing (a) BSA Copper complex (b) BSA-CuNCs under day light.

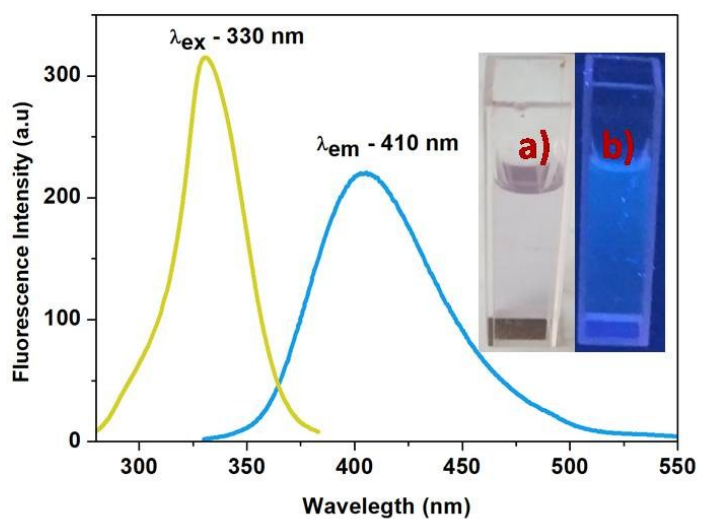

**Fig.S.2** The excitation (yellow line) and emission spectra (blue line) of BSA-CuNCs at room temperature ( $\lambda_{ex}$  330 nm,  $\lambda_{em}$  410 nm). The inset photographs show BSA-CuNCs (a) under daylight (b) under UV light (365 nm).

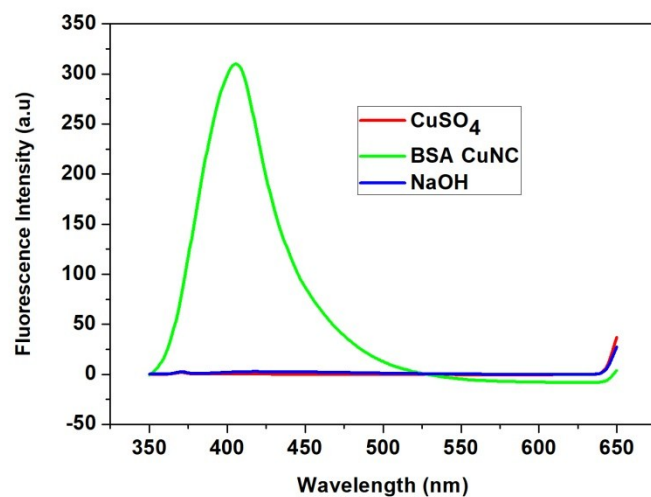

**Fig.S.3** Fluorescence emission spectra of CuSO<sub>4</sub>, BSA-CuNCs and NaOH in aqueous solution at room temperature ( $\lambda_{\text{ex}}$  330 nm,  $\lambda_{\text{em}}$  410 nm).

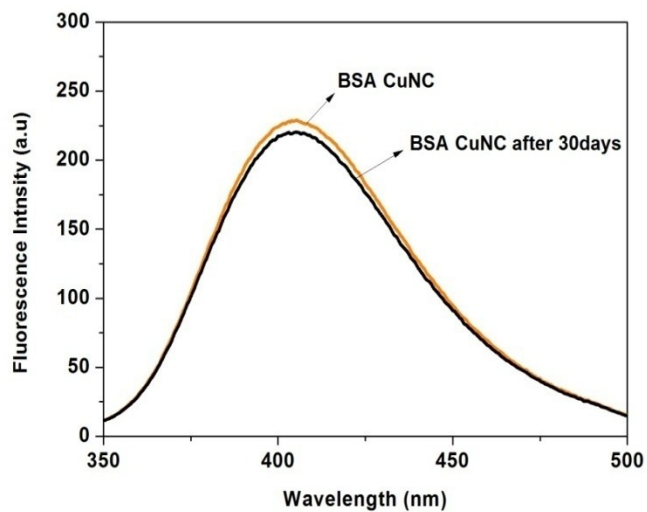

**Fig.S.4** Fluorescence stability of BSA CuNCs after 30 days of storage at 4<sup>0</sup>C ( $\lambda_{\text{ex}}$  330 nm,  $\lambda_{\text{em}}$  410 nm).

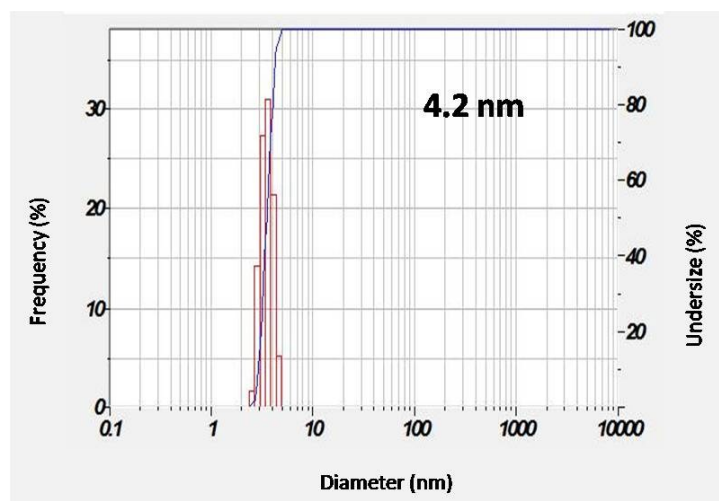

**Fig.S.5** The DLS size distribution of BSA-CuNCs. Size obtained is 4.2 nm.

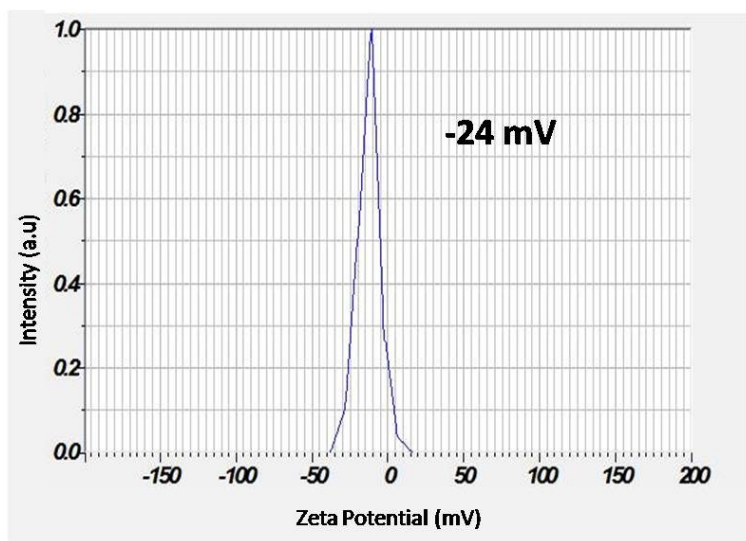

**Fig.S.6** Zeta potential analysis of BSA-CuNCs. Surface charge of BSA-CuNCs obtained is -24 mV.

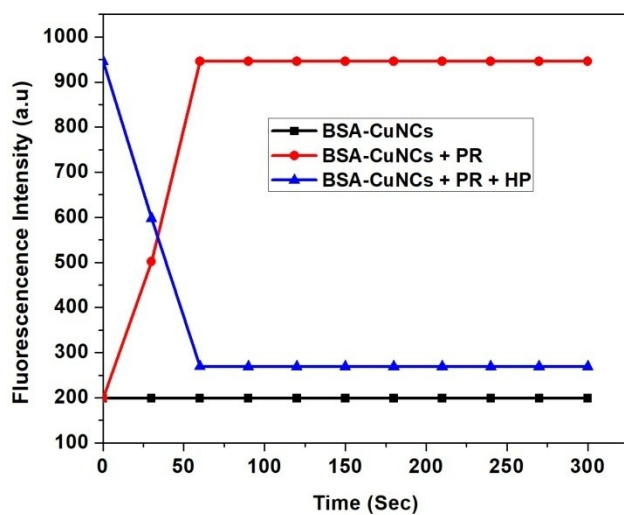

**Fig.S.7** The time response curve of BSA- CuNCs, protamine added BSA-CuNCs and heparin added BSA-CuNCs/PR system.

**Table.S.1** Comparison of the reported fluorescence probe for the selective detection of protamine.

| Sensor                                     | Detection limit   | Reference      |
|--------------------------------------------|-------------------|----------------|
| Carbon quantum dot and gold nanoparticle   | 1.2 ng/mL         | 1              |
| Glutathione capped CdTe quantum dot        | 1.0 ng/mL         | 2              |
| Gold nanoparticle coupled with fluorophore | 0.0067 $\mu$ g/mL | 3              |
| Silicon dot coupled with gold nanoparticle | 6.7 ng/mL         | 4              |
| FITC labelled DNA                          | 2.2 ng/mL         | 5              |
| BSA-CuNCs                                  | 0.12 ng/mL        | Present method |

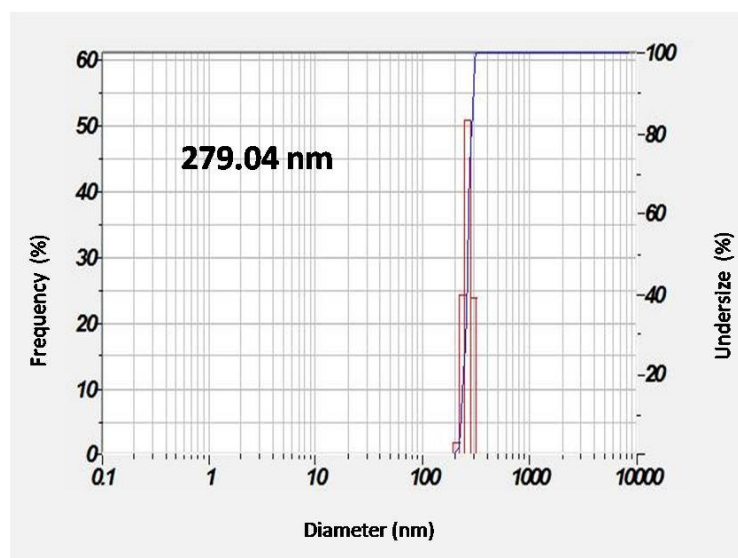

**Fig.S.8** The hydrodynamic size of protamine added BSA-CuNCs. Size obtained is 279.04 nm.

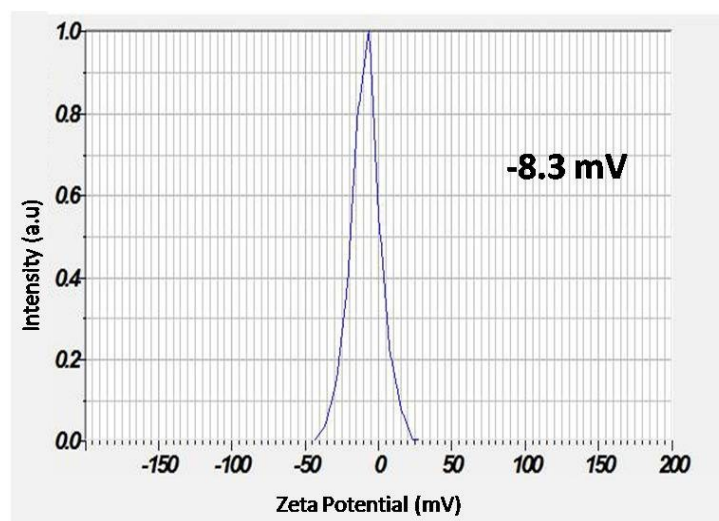

**Fig.S.9** The zeta potential analysis of protamine added BSA-CuNCs. Surface charge obtained is -8.3 mV.

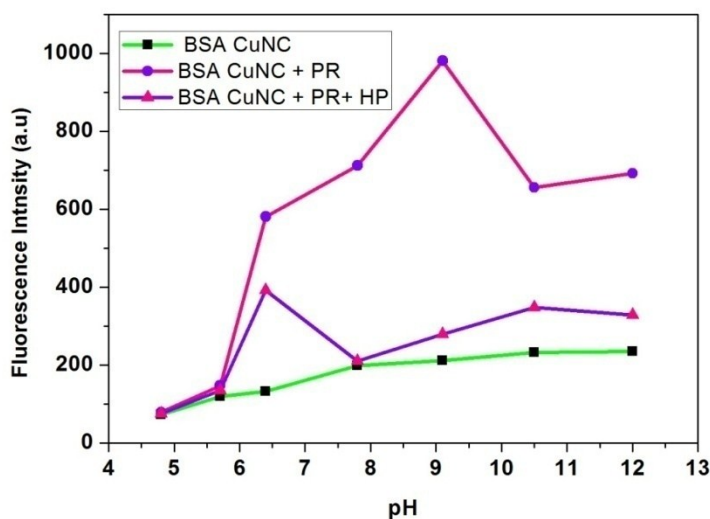

**Fig.S.10** Effect of pH on the fluorescence intensity of BSA-CuNCs, Protamine added BSA-CuNCs and Heparin added BSA-CuNCs/PR system at room temperature ( $\lambda_{\text{ex}}$  330 nm,  $\lambda_{\text{em}}$  410 nm).

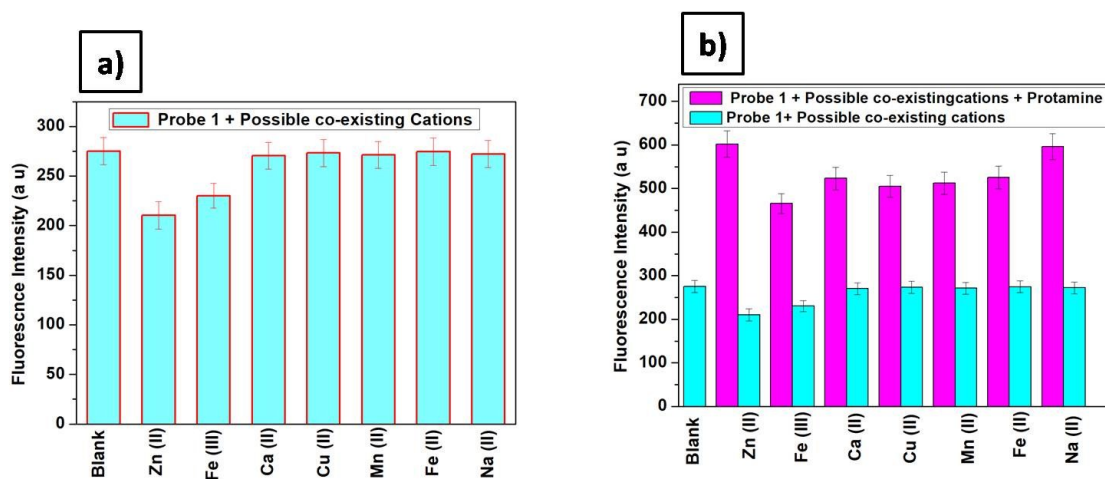

**Fig.S.11 (a)** Selectivity of BSA-CuNCs over other co-existing cations such as Zn(II), Fe(III), Ca(II), Cu(II), Mn(II), Fe(II) and Na(II) **(b)** Sensitivity of BSA-CuNCs/PR system over other co-existing cations. ( $\lambda_{\text{ex}}$  330 nm,  $\lambda_{\text{em}}$  410 nm). Probe 1 represents BSA-CuNCs. Concentration of all cations was kept as 100  $\mu\text{M}$ .

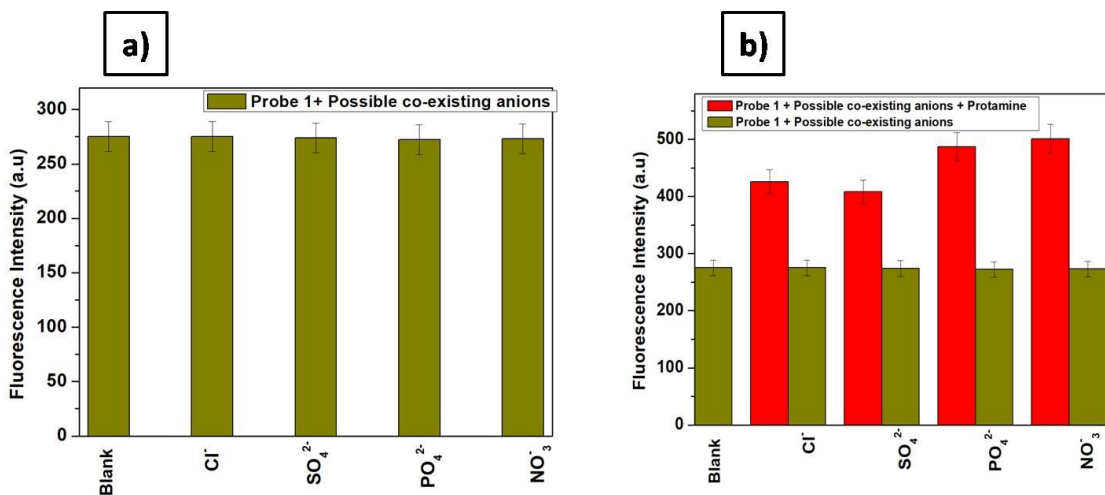

**Fig.S.12 (a)** Selectivity of BSA-CuNCs over other co-existing anions **(b)** Sensitivity of BSA-CuNCs/ PR system over other co-existing anions such as  $\text{Cl}^-$ ,  $\text{SO}_4^{2-}$ ,  $\text{PO}_4^{2-}$  and  $\text{NO}_3^-$  ( $\lambda_{\text{ex}}$  330 nm,  $\lambda_{\text{em}}$  410 nm). Probe 1 represents BSA-CuNCs. Concentration of all anions was kept as 100  $\mu\text{M}$ .

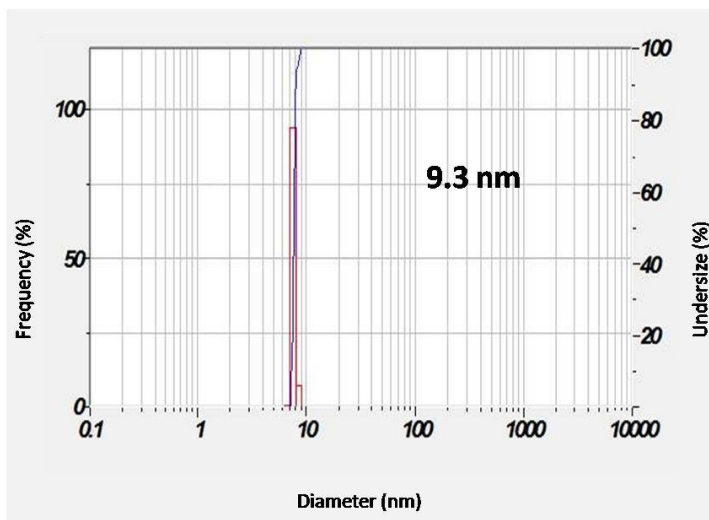

**Fig.S.13** The hydrodynamic size of heparin added BSA-CuNCs/PR system. Size obtained is 9.3 nm.



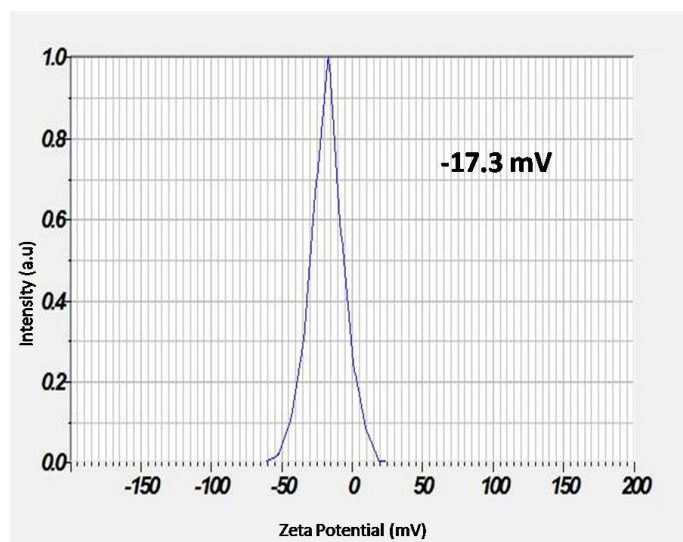

**Fig.S.14** The zeta potential analysis of heparin added BSA-CuNCs/PR system. Surface charge obtained is -17.3 mV.

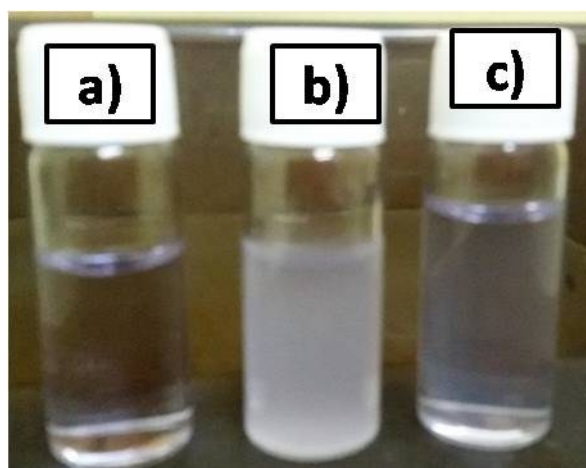

**Fig.S.15** (a) Photographs of BSA-CuNCs, (b) BSA- CuNCs/PR system, (c) BSA-CuNCs/PR after addition of heparin under day light.

**Table.S.2** Comparison of the reported detection methods for the selective detection of heparin.

| Sensor                                             | Detection limit  | Reference      |
|----------------------------------------------------|------------------|----------------|
| Silicon quantum dot coupled with gold nanoparticle | 0.67 ng/mL       | 4              |
| Cysteamine capped gold nanoparticle                | 0.03 $\mu$ g/mL  | 6              |
| Thioglycolic acid capped CdTe quantum dot          | 0.033 $\mu$ g/mL | 7              |
| Gold nanoparticle on grapheme oxide                | 3.0 ng/mL        | 8              |
| Emissive H aggregate of Thioflavin T               | 18 nM            | 9              |
| 4-MPY functionalized silver nanoparticles          | 0.5 ng/mL        | 10             |
| BSA CuNC/PR system                                 | 0.041 ng/mL      | Present method |

**Table.S.3** Nanosecond time resolved luminescent transients of BSA CuNCs, BSA CuNCs/PR system, heparin added BSA CuNCs/PR system. Pulsed excitation of 330 nm is used to measure the decay profile.

| System             | $\tau_1$ (ns) | $\tau_2$ (ns) | $\tau_{av}$ (ns) |
|--------------------|---------------|---------------|------------------|
| BSA CuNC           | 1.49 (24.10%) | 7.70 (75.90%) | 7.28             |
| BSA CuNC + PR      | 1.47 (24.72%) | 7.87 (75.28%) | 7.50             |
| BSA CuNC + PR + HP | 1.45 (23.95%) | 7.56 (76.05%) | 7.21             |

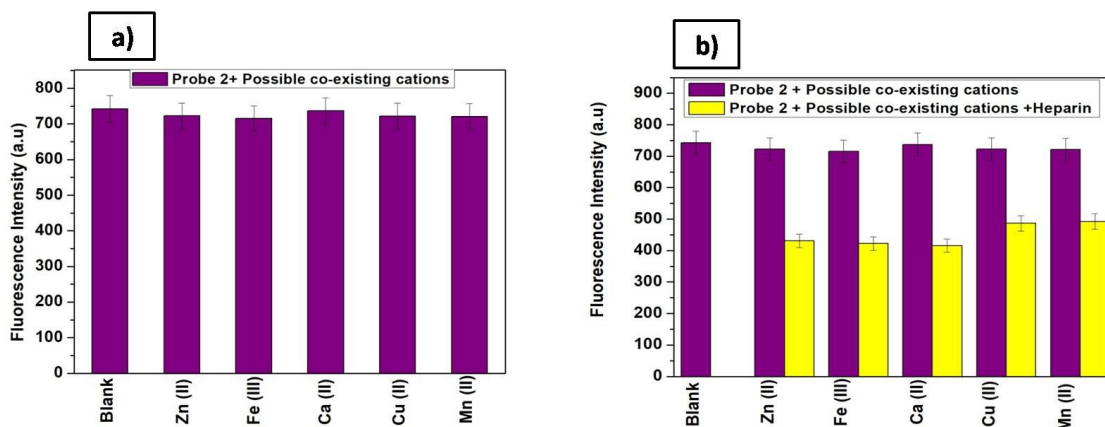

**Fig.S.16 (a)** Selectivity of BSA-CuNCs/PR system over other co-existing cations such as Zn(II), Fe(III), Ca(II), Cu(II), and Mn(II) **(b)** Sensitivity of heparin added BSA-CuNCs/ PR system over other co-existing cations ( $\lambda_{ex}$  330 nm,  $\lambda_{em}$  410 nm). Probe 2 represents BSA-CuNCs/PR. Concentration of all cations was kept as 100  $\mu$ M.

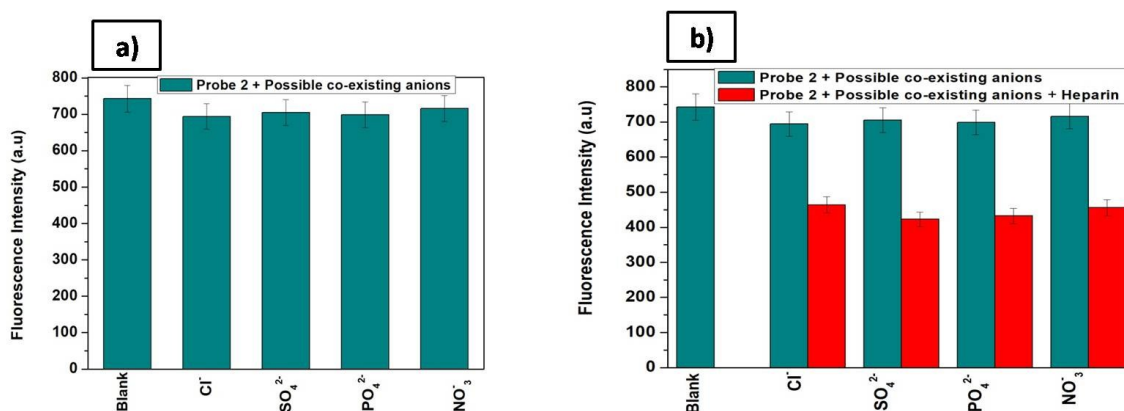

**Fig.S.17 (a)** Selectivity of BSA-CuNCs/PR system over other co-existing anions **(b)** Sensitivity of heparin added BSA-CuNCs/ PR system over other co-existing anions such as Cl<sup>-</sup>, SO<sub>4</sub><sup>2-</sup>, PO<sub>4</sub><sup>2-</sup> and NO<sub>3</sub><sup>-</sup> ( $\lambda_{ex}$  330 nm,  $\lambda_{em}$  410 nm). Probe 2 represents BSA-CuNCs/PR. Concentration of all anions was kept as 100  $\mu$ M.

## References

- 1 H. Rao, H. Ge, X. Wang, Z. Zhang, X. Liu, Y. Yang, Y. Liu, W. Liu, P. Zou and Y. Wang, *Microchim. Acta*, 2017, **184**, 3017–3025.
- 2 A. A. Ensafi, N. Kazemifard and B. Rezaei, *Biosens. Bioelectron.*, 2015, **71**, 243–248.
- 3 J. Zhao, Y. Yi, N. Mi, B. Yin, M. Wei, Q. Chen, H. Li, Y. Zhang and S. Yao, *Talanta*, 2013, **116**, 951–957.
- 4 X. Peng, Q. Long, H. Li, Y. Zhang and S. Yao, *Sens. Actuators B: Chem.*, 2015, **213**, 131–138.
- 5 S. Pang, S. Liu and X. Su, *RSC Adv.*, 2014, **4**, 25857–25862.
- 6 R. Cao and B. Li, *Chem. Commun.*, 2011, **47**, 2865–2867.
- 7 H. Z. Zhang, R. S. Li, N. Wang, L. Qi, C. Z. Huang and J. Wang, *Anal. Methods*, 2016, **8**, 453–459.
- 8 X. Fu, L. Chen and J. Li, *Analyst*, 2012, **137**, 3653–3658.
- 9 N. H. Mudliar and P. K. Singh, *ACS Appl. Mater. Interfaces*, 2016, **8**, 31505–31509.
- 10 X. Wang, L. Chen, X. Fu, L. Chen and Y. Ding, *ACS Appl. Mater. Interfaces*, 2013, **5**, 11059–11065.
